# Supplementary material for: Low Cancer Stem Cell Marker Expression and Low Hypoxia Identify Good Prognosis Subgroups in HPV(−) HNSCC after Postoperative Radiochemotherapy: A Multicenter Study of the DKTK-ROG
Source: Oxford University Press journal article supplement (doi:10.1158/1078-0432.ccr-15-1990), 2016-01-11
Supplement: 10780432ccr151990-sup-154273_1_supp_3217687_nxyh6t.docx [file 10780432ccr151990-sup-154273_1_supp_3217687_nxyh6t.docx]

Supplementary Table 4. Correlation of tumor hypoxia using nanoString vs PCR.

|  |  | **15-gene signature** | |
| --- | --- | --- | --- |
|  |  | **Hypoxia nanoString** | |
|  |  | **Low** | **High** |
| **15-gene signature** | **Low** | 69 | 12 |
| **Hypoxia PCR** | **High** | 8 | 99 |
|  |  | R=0.783 | p<0.001 |
|  |  |  |  |
|  |  | **26-gene signature** | |
|  |  | **Hypoxia nanoString** | |
|  |  | **Low** | **High** |
| **26-gene signature** | **Low** | 61 | 8 |
| **Hypoxia PCR** | **High** | 6 | 112 |
|  |  | R=0.838 | p<0.001 |
