# Supplementary material for: Low Cancer Stem Cell Marker Expression and Low Hypoxia Identify Good Prognosis Subgroups in HPV(−) HNSCC after Postoperative Radiochemotherapy: A Multicenter Study of the DKTK-ROG
Source: Oxford University Press journal article supplement (doi:10.1158/1078-0432.ccr-15-1990), 2016-01-11
Supplement: 10780432ccr151990-sup-154273_1_supp_3217690_ny09hj.docx [file 10780432ccr151990-sup-154273_1_supp_3217690_ny09hj.docx]

Supplementary Table 6A. Correlation of CSC marker expressions.

|  | **CD44** | ***CD44*** | ***MET*** | ***SLC3A2*** |
| --- | --- | --- | --- | --- |
| **CD44** | 1 | 0.465 | 0.332 | 0.350 |
| ***CD44*** |  | 1 | 0.398 | 0.421 |
| ***MET*** |  |  | 1 | 0.555 |
| ***SLC3A2*** |  |  |  | 1 |

Supplementary Table 6B. Multivariate analyses of stem cell markers and additional prognostic factors for all patients. HR = hazard ratio; 95% CI = 95 percent confidence interval ; ECE = extracapsular extension.

|  | **Loco-regional control** | | **Distant metastases** | | **Overall survival** | |
| --- | --- | --- | --- | --- | --- | --- |
| **Risk factor** | **HR (95% CI)** | **p-value** | **HR (95% CI)** | **p-value** | **HR (95% CI)** | **p-value** |
| *MET* | 3.61 (1.34-9.69) | **0.011** | 2.78 (1.27-6.07) | **0.010** | 2.18 (1.24-3.83) | **0.007** |
| HPV16 DNA | 0.23 (0.05-1.00) | **0.050** | 0.61 (0.23-1.58) | 0.306 | 0.42 (0.20-0.86) | **0.018** |
| ECE | 1.45 (0.66-3.19) | 0.359 | 2.98 (1.38-6.39) | **0.005** | 1.81 (1.07-3.06) | **0.026** |
| Oral cavity* | 1.98 (0.87-4.50) | 0.104 | 2.02 (0.92-4.41) | 0.079 | 1.56 (0.90-2.70) | 0.116 |
| Hypopharynx* | 0.73 (0.20-2.67) | 0.637 | 2.66 (1.05-6.75) | **0.039** | 0.71 (0.31-1.64) | 0.416 |
|  |  |  |  |  |  |  |
| *SLC3A2* | 3.61 (1.03-12.7) | **0.045** | 3.75 (1.46-9.59) | **0.006** | 1.53 (0.82-2.83) | 0.179 |
| HPV16 DNA | 0.25 (0.05-1.14) | 0.073 | 0.69 (0.26-1.85) | 0.466 | 0.39 (0.19-0.84) | **0.015** |
| ECE | 1.51 (0.69-3.30) | 0.307 | 3.21 (1.48-6.93) | **0.003** | 1.78 (1.05-2.99) | **0.031** |
| Oral cavity* | 1.85 (0.81-4.23) | 0.146 | 1.86 (0.84-4.09) | 0.125 | 1.60 (0.91-2.79) | 0.102 |
| Hypopharynx* | 0.86 (0.24-3.15) | 0.821 | 3.47 (1.35-8.95) | **0.010** | 0.80 (0.34-1.85) | 0.596 |
|  |  |  |  |  |  |  |
| *CD44* | 2.11 (0.77-5.77) | 0.148 | 1.29 (0.59-2.81) | 0.528 | 1.05 (0.59-1.86) | 0.867 |
| HPV16 DNA | 0.17 (0.04-0.76) | **0.021** | 0.48 (0.18-1.25) | 0.134 | 0.34 (0.17-0.70) | **0.003** |
| ECE | 1.55 (0.72-3.35) | 0.261 | 2.95 (1.37-6.35) | **0.006** | 1.73 (1.02-2.92) | **0.040** |
| Oral cavity* | 1.99 (0.87-4.56) | 0.102 | 2.11 (0.93-4.75) | 0.073 | 1.65 (0.93-2.94) | 0.088 |
| Hypopharynx* | 0.80 (0.22-2.94) | 0.742 | 2.27 (0.85-6.05) | 0.102 | 0.60 (0.25-1.47) | 0.265 |
|  |  |  |  |  |  |  |
| CD44 | 4.37 (0.57-33.5) | 0.155 | 1.68 (0.61-4.63) | 0.318 | 1.07 (0.52-2.20) | 0.866 |
| HPV16 DNA | 0.20 (0.05-0.91) | **0.038** | 0.49 (0.18-1.32) | 0.158 | 0.32 (0.15-0.67) | **0.003** |
| ECE | 1.56 (0.72-3.38) | 0.256 | 3.16 (1.50-6.64) | **0.002** | 1.71 (1.03-2.85) | **0.039** |
| Oral cavity* | 2.11 (0.93-4.75) | 0.073 | 2.12 (0.96-4.70) | 0.064 | 1.68 (0.96-2.94) | 0.072 |
| Hypopharynx* | 0.73 (0.20-2.66) | 0.628 | 3.47 (1.44-8.36) | **0.005** | 0.74 (0.33-1.63) | 0.449 |

* Baseline oropharynx.
