# Supplementary material for: Low Cancer Stem Cell Marker Expression and Low Hypoxia Identify Good Prognosis Subgroups in HPV(−) HNSCC after Postoperative Radiochemotherapy: A Multicenter Study of the DKTK-ROG
Source: Oxford University Press journal article supplement (doi:10.1158/1078-0432.ccr-15-1990), 2016-01-11
Supplement: 10780432ccr151990-sup-154273_1_supp_3217692_ny09hj.docx [file 10780432ccr151990-sup-154273_1_supp_3217692_ny09hj.docx]

Supplementary Table 8A. Correlation of hypoxia gene-signatures and HPV16 DNA.

|  |  | **HPV16 DNA** | |
| --- | --- | --- | --- |
|  |  | **Negative** | **Positive** |
| **15-gene** | **Low** | 53 | 26 |
| **signature** | **High** | 77 | 39 |
|  |  | R=0.007 | p=0.918 |
| **26-gene** | **Low** | 36 | 36 |
| **signature** | **High** | 94 | 29 |
|  |  | R=-0.271 | p<0.001 |

Supplementary Table 8B. Correlation of CSC marker expression and HPV16 DNA.

|  |  | **HPV16 DNA** | |
| --- | --- | --- | --- |
|  |  | **Negative** | **Positive** |
| **CD44** | **Low** | 14 | 30 |
|  | **High** | 116 | 35 |
|  |  | R=-0.399 | p<0.001 |
| ***MET*** | **Low** | 48 | 46 |
|  | **High** | 82 | 19 |
|  |  | R=-0.319 | p<0.001 |
| ***SLC3A2*** | **Low** | 32 | 45 |
|  | **High** | 98 | 20 |
|  |  | R=-0.430 | p<0.001 |
